# Supplementary material
Source: Springer Nature journal article supplement (https://www.springermedizin.de/resource/supplementary/12936_2008_852_MOESM3_ESM.pdf/9548400)

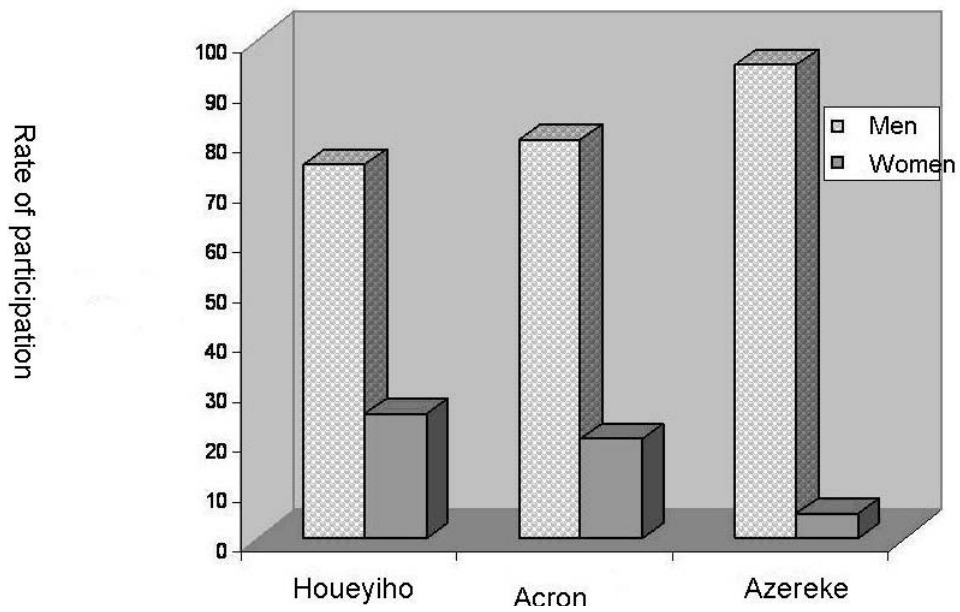

**Figure 5:** Participation in market gardening at the three sites of study (October 2005-december 2006).

Supplement: MOESM3 [file 9548400]
